# Supplementary material
Source: PubMed Central journal article supplement (PMC10188612)
Supplement: 42003_2023_4899_MOESM2_ESM.pdf [file 42003_2023_4899_MOESM2_ESM.pdf]

**Large libraries of single-chain trimer peptide-MHCs enable antigen-specific CD8+ T cell discovery and analysis**

**Authors:** William Chour<sup>1,2†</sup>, Jongchan Choi<sup>1†</sup>, Jingyi Xie<sup>1,3</sup>, Mary E. Chaffee<sup>4</sup>, Thomas M. Schmitt<sup>4</sup>, Kathryn Finton<sup>4</sup>, Diana C. DeLucia<sup>5</sup>, Alexander M. Xu<sup>1,6</sup>, Yapeng Su<sup>1,6</sup>, Daniel G. Chen<sup>1,7</sup>, Rongyu Zhang<sup>1,8</sup>, Dan Yuan<sup>1,8</sup>, Sunga Hong<sup>1</sup>, Alphonsus H.C. Ng<sup>1,6</sup>, Jonah Z. Butler<sup>4</sup>, Rick A. Edmark<sup>1</sup>, Lesley C. Jones<sup>1</sup>, Kim M. Murray<sup>1</sup>, Songming Peng<sup>9</sup>, Guideng Li<sup>10,11,12</sup>, Roland K. Strong<sup>4</sup>, John K. Lee<sup>5,13</sup>, Jason D. Goldman<sup>14,15</sup>, Philip D. Greenberg<sup>4,10,16</sup>, and James R. Heath<sup>1,8\*</sup>.

**SUPPLEMENTAL FIGURES and TABLES**

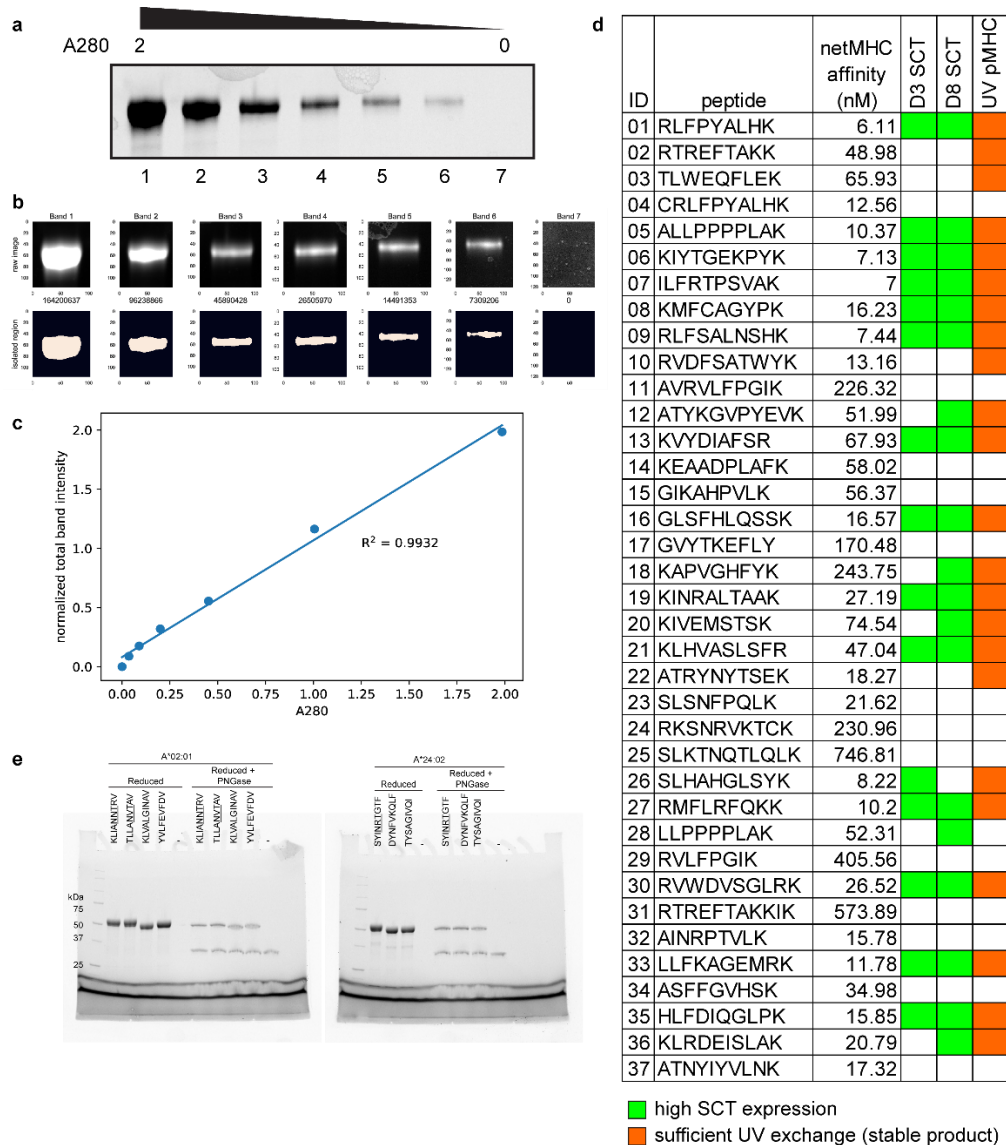

**Supplementary Figure 1. SCT yield quantification and a comparison of D3 and D8 SCTs and UV-exchanged pMHCs.** **a.** SDS-PAGE image of WT1 SCTs, titrated across a range of approximately 2.0 to 0 absorbance units (280 nm). **b.** Manually cropped areas of each band from reference gel (top). Isolated regions of bands identified by Python script (bottom). Integers below the top row represent the relative calculated intensity of each identified band (bottom). **c.** Scatterplot showing correlation of A280 values and calculated band intensity from SDS-PAGE for each reference band. **d.** A comparison of D3 and D8 SCTs and UV-exchanged pMHCs on the thirty-seven A\*03:01-restricted private neoantigens predicted for a melanoma patient. Relative expression of D3 and D8 SCTs were quantified according to methods outlined in (a-c, see Methods) and then converted into a binary format (based upon yield being above intensity threshold of 0.15) to identify stable/high-yield pMHCs (columns 4 & 5). Stabilization of the UV-exchanged pMHCs for the same peptides was measured via an ELISA assay, also converted into a binary format (ELISA efficiency > 30%) (column 6). **e.** Raw images of reduced SDS-PAGE results from Fig. 1c.

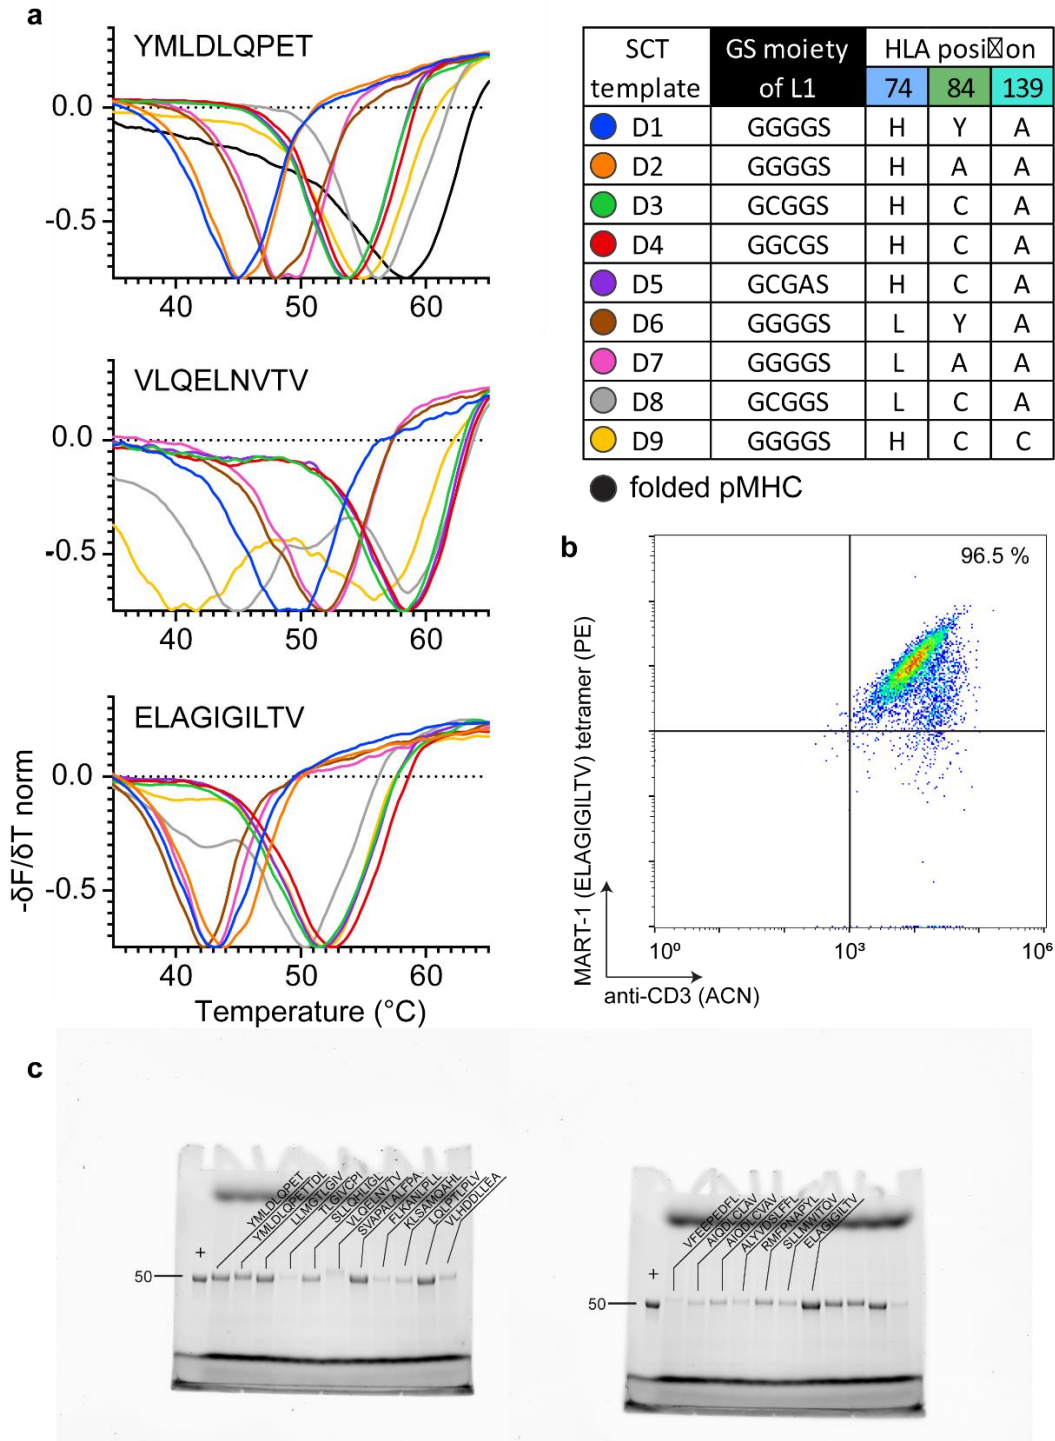

**Supplementary Figure 2. Characterization of SCT thermal stability and functional evaluation of SCT tetramer.** **a.** Thermal melting curves of SCTs. The negative of the change in fluorescence over the change in temperature ( $-\delta F/\delta T$ , first derivative) is measured for all SCT templates made against three peptides of **Fig. 2b** that expressed at a sufficient yield for purification. Melting curves are representative of a biological triplicate per SCT. **b.** Capturing of MART1-specific F5 TCR-transduced Jurkat cells with the MART1 epitope presenting SCT tetramers (D3 template). **c.** Raw images of reduced SDS-PAGE results from **Fig. 2b**.

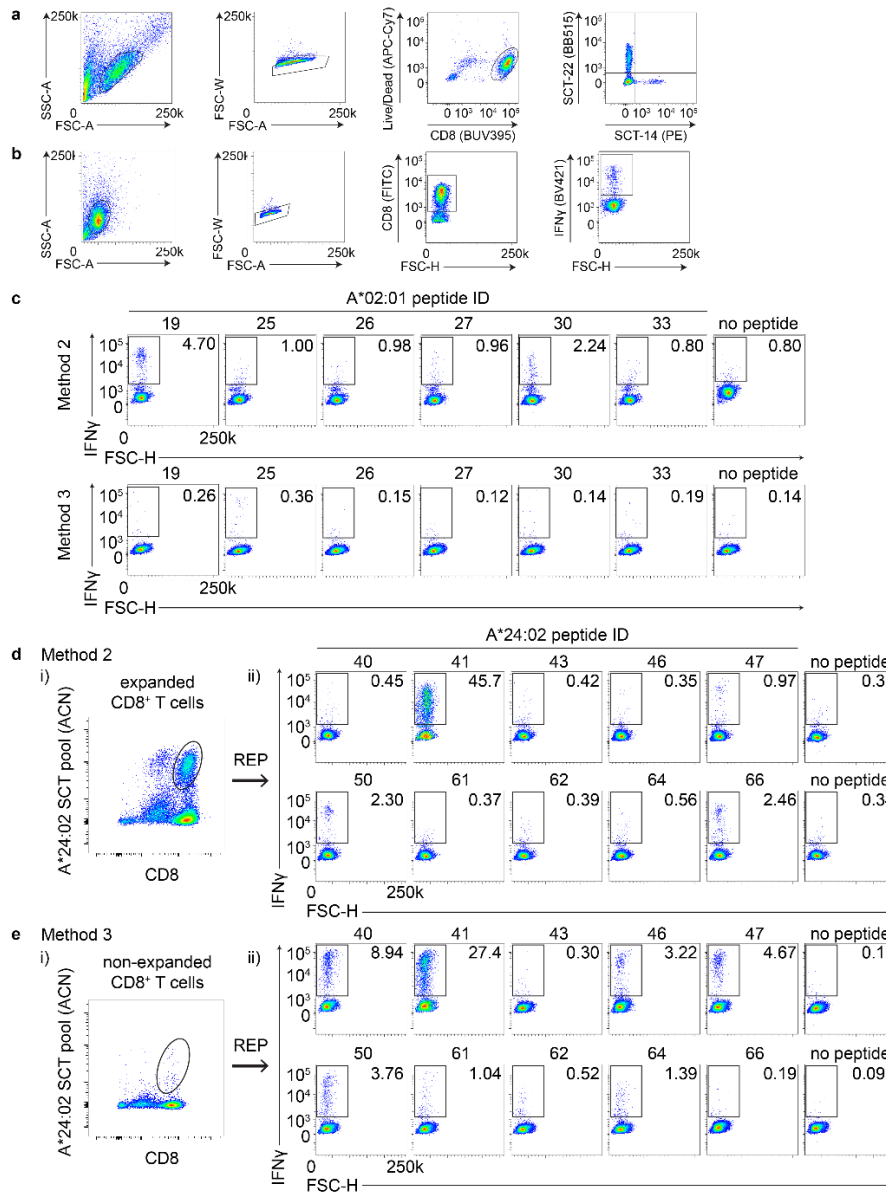

**Supplementary Figure 3. Flow cytometric analysis of antigen specific CD8<sup>+</sup> T cell response against commonly reported viral epitopes.** **a.** Gating strategies for flow cytometry plots of CD8<sup>+</sup> T cells captured by 5-color pooled SCT tetramers from peptide-stimulated and expanded CD8<sup>+</sup> T cells. Lymphocytes, single cells, CD8<sup>+</sup> T cells and tetramer positive populations were sequentially gated. **b.** Gating strategies for flow cytometry plots of IFN $\gamma$ <sup>+</sup> CD8<sup>+</sup> cells after peptide stimulation. **c.** Representative flow cytometry plots of IFN $\gamma$ <sup>+</sup> A\*02:01-restricted CD8<sup>+</sup> T cells after peptide stimulation. These cells were initially obtained by single-color pooled SCT tetramer binding and REP expansion (see **Fig. 3 c.i and d.i**). **d,e.** Representative flow cytometry plots of A\*24:02-restricted CD8<sup>+</sup> T cells initially captured by single-color pooled SCT tetramers from peptide-stimulated and expanded CD8<sup>+</sup> T cells (**d.i**) (Method #2) or from non-stimulated, non-expanded CD8<sup>+</sup> T cells (**e.i**) (Method #3). Subsequent flow plots represent IFN $\gamma$ <sup>+</sup> cells after peptide stimulation of expanded cells from the previously captured tetramer-positive subset (**d.ii, e.ii**). Peptide sequences found in **Supplementary Table 2**. Values in flow cytometry plots indicate the percentage of total cell population captured within outlined box. FSC, forward scatter; SSC, side scatter; A, area; W, width; H, height; SCT; single chain trimer; IFN $\gamma$ , interferon  $\gamma$ ; REP, rapid expansion protocol.

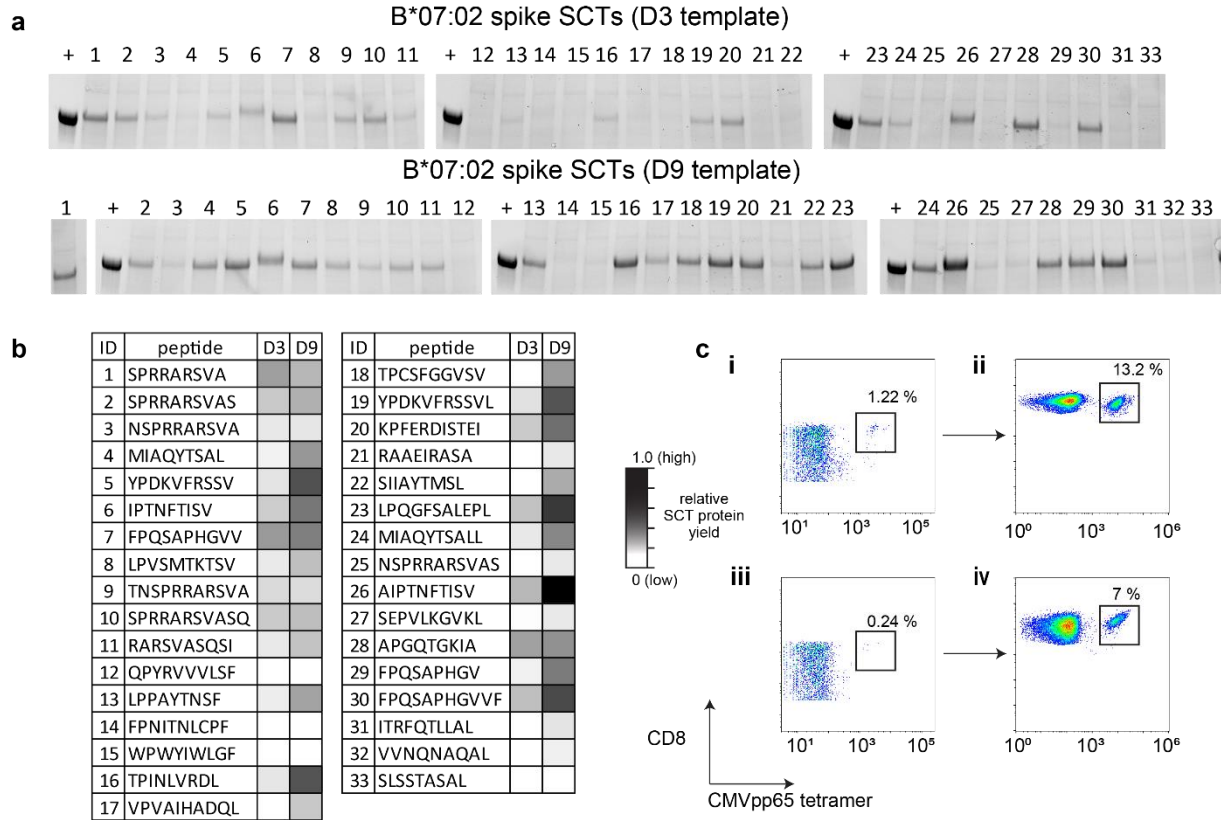

**Supplementary Figure 4. Expression and characterization of B\*07:02 spike SCTs and their usage to capture and expand antigen-specific CD8<sup>+</sup> T cell populations.** **a.** Reduced SDS-PAGE of B\*07:02 spike epitope SCTs using two templates (B\_Y84C corresponds to template D3 and A\_Y84C\_A139C corresponds to template D9 (DS-SCT) of table in Figure 2.B). +, purified WT1 SCT. **b.** SCT yield heatmap comparing relative expression results for the two templates. **c.** Flow cytometry plots of CMVpp65 specific CD8<sup>+</sup> T cell populations before (i and iii) and after (ii and iv) tetramer-guided sorting and expansion in the two A\*02:01 COVID-19 patients. The inset box in each plot shows the frequency of CMVpp65 specific CD8<sup>+</sup> T cell population.

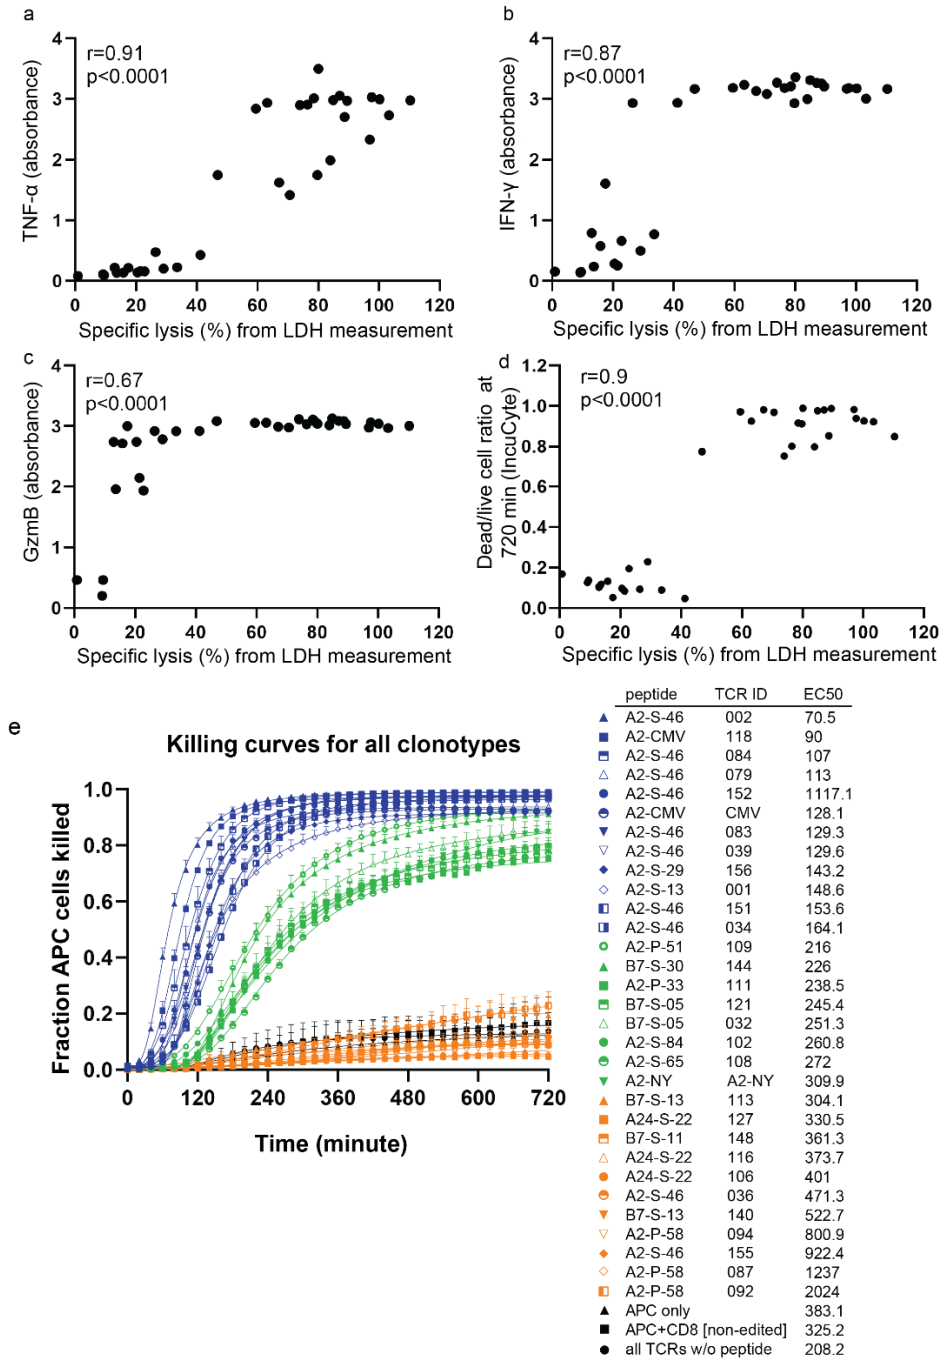

**Supplementary Figure 5. Linear regression analysis of T cell functional data and curve fitting for time course killing curves. a-c.** Scatter plots showing positive correlations between all three functional cytokines (TNF $\alpha$ , IFN $\gamma$ , and GzmB) and the assayed LDH levels. **d.** A scatter plot of data obtained from the two cytotoxic assays (incuCyte killing assay and non-radioactive cytotoxicity assay for LDH measurement). **e.** Nonlinear regression curve fitting and analysis of EC50 from IncuCyte kinetic curves. Error bars represent standard deviation from independent triplicate measurements. The list of peptide, internal TCR ID, and calculated EC50 values are in table. LDH, lactate dehydrogenase; TNF $\alpha$ , tumor necrosis factor  $\alpha$ ; IFN $\gamma$ , interferon  $\gamma$ ; GzmB, granzyme B; NY, SLLMWITQC (NY-ESO-1); CMV, NLVPMVATV; A2, A\*02:01; B7, B\*07:02; APC, antigen-presenting cell; P, PLpro; S, spike.

**Supplementary Table 1. Tumor-associated peptides and sources.**

| peptide ID | peptide      | protein       | PubMed ref ID |
|------------|--------------|---------------|---------------|
| 1          | YMLDLQPET    | E7 (PPV-9)    | 29669936      |
| 2          | YMLDLQPETTDL | E7 (PPV-9)    | 27693214      |
| 3          | LLMGTLGIV    | E7 (PPV-9)    | 26418056      |
| 4          | TLGIVCPI     | E7 (PPV-9)    | 8617954       |
| 5          | SLLQHILIGL   | MART          | 22424782      |
| 6          | VLQELNVTV    | Myeloblastin  | PMC1534319    |
| 7          | SVAPALALFPA  | LB-ADIR-1F    | 17234742      |
| 8          | FLKANLPLL    | MTG8b         | 11122105      |
| 9          | KLSAMQAHL    | Foxp3         | 23812418      |
| 10         | LQLPTLPLV    | Foxp3         | 19456276      |
| 11         | VLHDDLLEA    | HA-1/A2       | 18698046      |
| 12         | VFEEDFL      | Foxp3         | 23812418      |
| 13         | AIQDLCLAV    | nucleophosmin | 31291378      |
| 14         | AIQDLCVAV    | nucleophosmin | 31291378      |
| 15         | ALYVDSLFFL   | PRAME         | PMC2195886    |
| 16         | RMFPNAPYL    | WT1           | PMC5722674    |
| 17         | SLLMWITQV    | NY-ESO-1      | PMC5941317    |
| 18         | ELAGIGILTV   | MART-1        | 16860654      |

**Supplementary Table 2. Viral/bacterial A\*02:01 and A\*24:02 peptides used for SCT production**

| ID | peptide     | antigen                       | HLA     | yield |
|----|-------------|-------------------------------|---------|-------|
| 1  | LLFGYPVYV   | HTLV-1 Tax                    | A*02:01 | 0.35  |
| 2  | KLVALGINAV  | HCV                           | A*02:01 | 0.50  |
| 3  | GLCTLVAML   | EBV-BLMF1                     | A*02:01 | 0.00  |
| 4  | WLSLLVPFV   | HBV-SAg                       | A*02:01 | 0.03  |
| 5  | YVLDHLIVV   | EBV-BRLF1                     | A*02:01 | 0.45  |
| 6  | SITEVECFL   | Human polyomavirus 2 protein  | A*02:01 | 0.29  |
| 7  | FLLSLGIHL   | HBV                           | A*02:01 | 0.36  |
| 8  | GILGFVFTL   | Flu-M1                        | A*02:01 | 0.05  |
| 9  | SLFNTVATL   | HIV gag                       | A*02:01 | 0.52  |
| 10 | YLLFEVFDV   | AdV 11 Hexon                  | A*02:01 | 0.45  |
| 11 | LLFEVFDVV   | AdV 11 Hexon                  | A*02:01 | 0.79  |
| 12 | YVLFVFDV    | AdV 11 Hexon                  | A*02:01 | 0.43  |
| 13 | FLDKGTYTL   | EBV BALF4                     | A*02:01 | 0.12  |
| 14 | YLQQNWWTL   | EBV-LMP1-2                    | A*02:01 | 0.48  |
| 15 | YLLEMLWRL   | EBV-LMP1-1                    | A*02:01 | 0.12  |
| 16 | FLYALALLL   | EBV-LMP1-2                    | A*02:01 | 0.10  |
| 17 | VLEETSVML   | CMV-IE1                       | A*02:01 | 0.00  |
| 18 | TLNAWVKVV   | HIV-gag                       | A*02:01 | 0.08  |
| 19 | AIMDKNIIL   | Influenza NS1                 | A*02:01 | 0.33  |
| 20 | KLIANNTRV   | M. tuberculosis Ag85A         | A*02:01 | 0.38  |
| 21 | ALWALPHAA   | varicella-zoster IE62 593-601 | A*02:01 | 0.05  |
| 22 | NLVPMVATV   | CMV-pp65                      | A*02:01 | 0.70  |
| 23 | FMYSDFHFI   | Influenza A                   | A*02:01 | 0.56  |
| 24 | YLLPGWKL    | Rota-VP3                      | A*02:01 | 0.00  |
| 25 | NMLSTVLGV   | Flu-PB1                       | A*02:01 | 0.61  |
| 26 | SLMDPAITSL  | Rota-VP1                      | A*02:01 | 1.42  |
| 27 | TLLANVTAV   | Rota-VP6                      | A*02:01 | 0.85  |
| 28 | FMDILTTCVET | CMV-IE1-2                     | A*02:01 | 0.23  |
| 29 | QMWQARLTV   | CMV-pp65-2                    | A*02:01 | 0.07  |
| 30 | SLISGMWLL   | Rota-VP2-1                    | A*02:01 | 0.26  |
| 31 | LLNYILKSV   | Rota-VP7-1                    | A*02:01 | 0.14  |
| 32 | LMNGQQIFL   | CMV-pp65-3                    | A*02:01 | 0.26  |
| 33 | FLDSEPHLL   | Rota-NSP1                     | A*02:01 | 0.15  |
| 34 | ALWGPDPAAA  | Proinsulin precursor 15-24    | A*02:01 | 0.23  |
| 35 | TLDYKPLSV   | EBV BMRF1                     | A*02:01 | 0.07  |
| 36 | CLGGLTMV    | EBV-LMP2A                     | A*02:01 | 0.04  |
| 37 | TYFNLGNKF   | AdV 11 Hexon (37-45)          | A*24:02 | 0.80  |
| 38 | VYSGSIPYL   | AdV 11 Hexon (696-704)        | A*24:02 | 0.18  |



|    |           |                         |         |      |                                                                                       |
|----|-----------|-------------------------|---------|------|---------------------------------------------------------------------------------------|
| 39 | TYFSLNKF  | AdV 5 Hexon (37-45)     | A*24:02 | 0.93 |    |
| 40 | DYNFVKQLF | EBV BMLF1 (320-328)     | A*24:02 | 0.84 |    |
| 41 | TYPVLEEMF | EBV BRLF1 (198-206)     | A*24:02 | 1.39 |    |
| 42 | RYSIFFDYM | EBV EBNA3A (246-254)    | A*24:02 | 0.05 |    |
| 43 | TYSAGIVQI | EBV EBNA3B (217-225)    | A*24:02 | 0.84 |    |
| 44 | IYVLVMLVL | EBV LMP2 (222-230)      | A*24:02 | 0.00 |    |
| 45 | PYLFWLAAI | EBV LMP2 (131-139)      | A*24:02 | 0.00 |    |
| 46 | TYGPFVMSL | EBV LMP2 (419-427)      | A*24:02 | 1.13 |    |
| 47 | TYGPFVMCL | EBV LMP2 (419-427)      | A*24:02 | 0.64 |    |
| 48 | EYLVSGVW  | HBV core (117-125)      | A*24:02 | 0.59 |    |
| 49 | KYTSFPWLL | HBV pol (756-764)       | A*24:02 | 0.23 |    |
| 50 | QYDPVAALF | HCMV pp65 (341-349)     | A*24:02 | 0.51 |    |
| 51 | EYVLLLFL  | HCV E2 (717-725)        | A*24:02 | 0.00 |    |
| 52 | PFHCSFHTI | HHV-6B U54 (267-275)    | A*24:02 | 0.00 |    |
| 53 | RYLRDQQLL | HIV env gp160 (584-592) | A*24:02 | 0.19 |    |
| 54 | RYLKDQQLL | HIV env (67-75)         | A*24:02 | 0.20 |    |
| 55 | RYPLTFGW  | HIV nef (134-141)       | A*24:02 | 0.26 |    |
| 56 | VYDFAFRDL | HPV16 E6 (49-57)        | A*24:02 | 0.13 |    |
| 57 | FFQFCPLIF | HTLV-1 Env (43788)      | A*24:02 | 0.63 |    |
| 58 | LFGYPVYVF | HTLV-1 Tax (43819)      | A*24:02 | 0.51 |   |
| 59 | PYKRIEELL | HTLV-1 Tax (187-195)    | A*24:02 | 0.00 |  |
| 60 | SFHSLHLLF | HTLV-1 Tax (301-309)    | A*24:02 | 0.83 |  |
| 61 | YYLEKANKI | Influenza PA (130-138)  | A*24:02 | 0.99 |  |
| 62 | SYLIRALTL | Influenza PB1 (216-224) | A*24:02 | 0.39 |  |
| 63 | RYTKTTYWW | Influenza PB1 (430-438) | A*24:02 | 0.11 |  |
| 64 | SYINRTGTF | Influenza PB1 (482-490) | A*24:02 | 1.02 |  |
| 65 | RYGFVANF  | Influenza PB1 (498-505) | A*24:02 | 0.00 |  |
| 66 | TYQWIIRNW | Influenza PB2 (549-557) | A*24:02 | 0.90 |  |

**Supplementary Table 3. A\*02:01 spike peptides used for SCT production**

| ID | peptide     | domain | span      | length | predicted |       | ID |
|----|-------------|--------|-----------|--------|-----------|-------|----|
|    |             |        |           |        | affinity  | yield |    |
| 01 | YLQPRTFLL   | NTD    | 269-277   | 9      | 5.4       | 0.33  | 01 |
| 02 | FQFCNDPFL   | NTD    | 133-141   | 9      | 9.2       | 1.19  | 02 |
| 03 | FIAGLIAIV   | TM     | 1220-1228 | 9      | 10.3      | 0.09  | 03 |
| 04 | FVSNQTHWV   | CD     | 1095-1104 | 10     | 13.1      | 0.53  | 04 |
| 05 | SIIAYTMSL   | S2     | 691-699   | 9      | 13.5      | 0.88  | 05 |
| 06 | KLNDLCFTNV  | RBD    | 386-395   | 10     | 15.3      | 0.21  | 06 |
| 07 | RLQSLQTYV   | CH     | 1000-1008 | 9      | 16.7      | 0.18  | 07 |
| 08 | YHLMSFPQSA  | S2     | 1047-1056 | 10     | 17.9      | 0.08  | 08 |
| 09 | YIKWPWYIWL  | S2/TM  | 1209-1218 | 10     | 18.8      | 0.00  | 09 |
| 10 | YIWLGLFIAGL | TM     | 1215-1224 | 10     | 20.5      | 0.09  | 10 |
| 11 | FELLHAPATV  | RBD/S1 | 515-524   | 10     | 21        | 0.16  | 11 |
| 12 | FTISVTTEI   | S2     | 718-726   | 9      | 25.4      | 1.74  | 12 |
| 13 | LLFNKVTLA   | FP     | 821-829   | 9      | 25.4      | 1.74  | 13 |
| 14 | HLMSFPQSA   | S2     | 1048-1056 | 9      | 26.4      | 1.24  | 14 |
| 15 | FVFLVLLPLV  | S      | 2-11      | 10     | 32.6      | 0.00  | 15 |
| 16 | VLNDILSR    | HR1    | 976-984   | 9      | 33.6      | 0.11  | 16 |
| 17 | FIEDLLFNKV  | FP     | 817-826   | 10     | 36        | 0.11  | 17 |
| 18 | GYLQPRTFLL  | NTD    | 268-277   | 10     | 36.1      | 0.13  | 18 |
| 19 | KIADYNYKL   | RBD    | 417-425   | 9      | 36.1      | 0.50  | 19 |
| 20 | VVFLHVTVV   | S2     | 1060-1068 | 9      | 36.6      | 0.08  | 20 |
| 21 | RLDKVEAEV   | HR1/CH | 983-991   | 9      | 39        | 0.23  | 21 |
| 22 | FVFLVLLPL   | S      | 2-10      | 9      | 41.7      | 0.00  | 22 |
| 23 | GFIAGLIAIV  | TM     | 1219-1228 | 10     | 56.9      | 0.15  | 23 |
| 24 | YQDVNCTEV   | S1     | 612-620   | 9      | 57.8      | 0.83  | 24 |
| 25 | FLHVTVVPA   | S2     | 1062-1070 | 9      | 65.2      | 0.73  | 25 |
| 26 | MIAQYTSAL   | S2     | 869-877   | 9      | 69        | 0.92  | 26 |
| 27 | KLPDDFTGCV  | RBD    | 424-433   | 10     | 77.1      | 0.26  | 27 |
| 28 | GLIAIVMVTI  | TM     | 1223-1232 | 10     | 80.8      | 0.00  | 28 |
| 29 | KQIYKTPPI   | S2     | 786-794   | 9      | 85.6      | 0.61  | 29 |
| 30 | EFQCNDPFL   | NTD    | 132-141   | 10     | 87.8      | 0.00  | 30 |
| 31 | TKLNDLCFTNV | RBD    | 385-395   | 11     | 91.2      | 0.00  | 31 |
| 32 | SVTTEILPV   | S2     | 721-729   | 9      | 113.1     | 0.90  | 32 |
| 33 | YLQPRTFLLK  | NTD    | 269-278   | 10     | 118.8     | 0.54  | 33 |
| 34 | MQMAYRFNGI  | S2/HR1 | 900-909   | 10     | 120.9     | 0.39  | 34 |
| 35 | FQFCNDPFLGV | NTD    | 133-143   | 11     | 126.8     | 1.09  | 35 |
| 36 | GRLQSLQTYV  | CH     | 999-1008  | 10     | 128.4     | 0.13  | 36 |
| 37 | GLTVLPPLL   | S2     | 857-865   | 9      | 130.4     | 0.13  | 37 |
| 38 | FIAGLIAIVMV | TM     | 1220-1230 | 11     | 136.3     | 0.09  | 38 |

|    |              |        |           |    |       |      |    |
|----|--------------|--------|-----------|----|-------|------|----|
| 39 | VFVSNNGTHWFV | CD     | 1094-1104 | 11 | 137.7 | 0.00 | 39 |
| 40 | WYIWLGFIAGL  | TM     | 1214-1224 | 11 | 140.1 | 0.00 | 40 |
| 41 | SFELLHAPATV  | RBD/S1 | 514-524   | 11 | 140.8 | 0.10 | 41 |
| 42 | KQLSSNFGA    | HR1    | 964-972   | 9  | 141.2 | 0.22 | 42 |
| 43 | FIAGLIAIVM   | TM     | 1220-1229 | 10 | 143   | 0.10 | 43 |
| 44 | TLDSKTQSL    | NTD    | 109-117   | 9  | 153.6 | 0.12 | 44 |
| 45 | MFVFLVLLPL   | S      | 1-10      | 10 | 157.8 | 0.00 | 45 |
| 46 | RLITGRLQSL   | CH     | 995-1004  | 10 | 167   | 1.06 | 46 |
| 47 | GYHLMSFPQSA  | S2     | 1046-1056 | 11 | 172.6 | 0.09 | 47 |
| 48 | NLNESLIDL    | HR2    | 1192-1200 | 9  | 177.3 | 0.24 | 48 |
| 49 | VLYENQKLI    | HR1    | 915-923   | 9  | 194.4 | 0.16 | 49 |
| 50 | KLIANQFNSA   | HR1    | 921-930   | 10 | 195.6 | 1.09 | 50 |
| 51 | VTWFHAIHV    | NTD    | 62-70     | 9  | 202   | 0.17 | 51 |
| 52 | DLLFNKVTLA   | FP     | 820-829   | 10 | 202   | 0.08 | 52 |
| 53 | QSIAYTMSL    | S2     | 690-699   | 10 | 207.4 | 0.00 | 53 |
| 54 | SRLDKVEAEV   | HR1/CH | 982-991   | 10 | 221.2 | 0.08 | 54 |
| 55 | QYIKWPWYIWL  | S2/TM  | 1208-1218 | 11 | 223.4 | 0.00 | 55 |
| 56 | TLLALHRSYL   | NTD    | 240-249   | 10 | 227.8 | 0.33 | 56 |
| 57 | MFVFLVLLPLV  | S      | 1-11      | 11 | 229   | 0.00 | 57 |
| 58 | GLIAIVMVT    | TM     | 1223-1231 | 9  | 242   | 0.06 | 58 |
| 59 | YTNSFTRGV    | NTD    | 28-36     | 9  | 245.1 | 0.18 | 59 |
| 60 | ITSGWTFGA    | S2     | 882-890   | 9  | 265.1 | 0.11 | 60 |
| 61 | KNLNESLIDL   | HR2    | 1191-1200 | 10 | 268.8 | 0.07 | 61 |
| 62 | GVVFLHVTVV   | S2     | 1059-1068 | 10 | 272.4 | 0.12 | 62 |
| 63 | LLIVNNATNV   | NTD    | 117-126   | 10 | 272.8 | 0.16 | 63 |
| 64 | SLSSTASAL    | HR1    | 937-945   | 9  | 273.3 | 0.22 | 64 |
| 65 | KIYSKHTPI    | NTD    | 202-210   | 9  | 288.5 | 0.36 | 65 |
| 66 | FVSGNCDVV    | CD     | 1121-1129 | 9  | 290.4 | 0.12 | 66 |
| 67 | FQFCNDPFLG   | NTD    | 133-142   | 10 | 296.2 | 1.17 | 67 |
| 68 | KLNDLCFTNVY  | RBD    | 386-396   | 11 | 302.6 | 0.16 | 68 |
| 69 | VLSFELLHA    | RBD    | 512-520   | 9  | 302.6 | 0.11 | 69 |
| 70 | AIPTNFTISV   | S2     | 713-722   | 10 | 324.5 | 0.11 | 70 |
| 71 | VLLPLVSSQCV  | S/NTD  | 16-Jun    | 11 | 325.3 | 0.49 | 71 |
| 72 | LLALHRSYL    | NTD    | 241-249   | 9  | 329.1 | 0.23 | 72 |
| 73 | IITTDNTFV    | CD     | 1114-1122 | 9  | 338.8 | 0.10 | 73 |
| 74 | IMLCCMTSC    | TM/CT  | 1232-1240 | 9  | 349   | 0.13 | 74 |
| 75 | VFLHVTVVPA   | S2     | 1061-1070 | 10 | 377.3 | 0.00 | 75 |
| 76 | ELLHAPATV    | RBD/S1 | 516-524   | 9  | 380.7 | 0.99 | 76 |
| 77 | VLHSTQDLFL   | NTD    | 47-56     | 10 | 382.2 | 0.00 | 77 |
| 78 | VLYNSASFST   | RBD    | 367-376   | 10 | 388.9 | 0.29 | 78 |
| 79 | YRVVLSFEL    | RBD    | 508-517   | 10 | 391.5 | 0.00 | 79 |
| 80 | SFIEDLLFNKV  | FP     | 816-826   | 11 | 394.6 | 0.05 | 80 |
| 81 | FLPFFSNVT    | NTD    | 55-63     | 9  | 398.9 | 0.15 | 81 |

|    |             |        |           |    |       |      |  |    |
|----|-------------|--------|-----------|----|-------|------|--|----|
| 82 | SVLNDILSRL  | HR1    | 975-984   | 10 | 399.3 | 0.22 |  | 82 |
| 83 | ALEPLVDLPI  | NTD    | 222-231   | 10 | 405.6 | 0.07 |  | 83 |
| 84 | ALQIPFAMQM  | S2     | 893-902   | 10 | 415.7 | 1.76 |  | 84 |
| 85 | RVVVLSFEL   | RBD    | 509-517   | 9  | 419.8 | 0.12 |  | 85 |
| 86 | FTISVTTEIL  | S2     | 718-727   | 10 | 419.8 | 1.66 |  | 86 |
| 87 | FELLHAPATVC | RBD/S1 | 515-525   | 11 | 435.6 | 0.09 |  | 87 |
| 88 | YIWLGFIAGLI | TM     | 1215-1225 | 11 | 436.3 | 0.00 |  | 88 |
| 89 | KTSVDCTMYI  | S2     | 733-742   | 10 | 438.1 | 0.00 |  | 89 |
| 90 | GIYQTSNFRV  | S1     | 311-320   | 10 | 449   | 0.09 |  | 90 |
| 91 | MIAQYTSALL  | S2     | 869-878   | 10 | 453   | 1.10 |  | 91 |
| 92 | LGFIAGLIAIV | TM     | 1218-1228 | 11 | 457.3 | 0.08 |  | 92 |
| 93 | VGYLQPRTFLL | NTD    | 267-277   | 11 | 461.4 | 0.06 |  | 93 |
| 94 | WTAGAAAYYV  | NTD    | 258-267   | 10 | 463.3 | 0.08 |  | 94 |
| 95 | SWMESEFRV   | NTD    | 151-159   | 9  | 475.3 | 0.09 |  | 95 |
| 96 | NFTISVTTEI  | S2     | 717-726   | 10 | 501.6 | 0.13 |  | 96 |

**Supplementary Table 4. A\*24:02 spike peptides used for SCT production**

| ID | peptide     | domain | span      | length | predicted<br>nM<br>affinity | yield | ID |
|----|-------------|--------|-----------|--------|-----------------------------|-------|----|
| 01 | KWPWYIWLGF  | TM     | 1211-1220 | 10     | 9                           | 0.16  | 01 |
| 02 | LYNSASFSTF  | RBD    | 368-377   | 10     | 12.3                        | 0.31  | 02 |
| 03 | QYIKWPWYI   | TM     | 1208-1216 | 9      | 13.2                        | 0.32  | 03 |
| 04 | QYIKWPWYIW  | TM     | 1208-1217 | 10     | 14.9                        | 0.00  | 04 |
| 05 | VYSTGSNVF   | S1     | 635-643   | 9      | 19                          | 0.46  | 05 |
| 06 | VYSSANNCTF  | NTD    | 159-168   | 10     | 21.9                        | 0.55  | 06 |
| 07 | CYFPLQSYGF  | RBD    | 488-497   | 10     | 26.6                        | 0.00  | 07 |
| 08 | NYNYLYRLF   | RBD    | 448-456   | 9      | 28.9                        | 0.49  | 08 |
| 09 | RVYSTGSNVF  | S1     | 634-643   | 10     | 36.3                        | 0.16  | 09 |
| 10 | IKWPWYIWLGF | TM     | 1210-1220 | 11     | 36.3                        | 0.00  | 10 |
| 11 | PFAMQMAYRF  | S2     | 897-906   | 10     | 38.9                        | 0.00  | 11 |
| 12 | YFPLQSYGF   | RBD    | 489-497   | 9      | 41.5                        | 0.00  | 12 |
| 13 | KWPWYIWLGFI | TM     | 1211-1221 | 11     | 42.1                        | 0.78  | 13 |
| 14 | EQYIKWPWYI  | TM     | 1207-1216 | 10     | 45.3                        | 0.33  | 14 |
| 15 | YEQYIKWPWYI | TM     | 1206-1216 | 11     | 55.8                        | 0.31  | 15 |
| 16 | VLYNSASFSTF | RBD    | 367-377   | 11     | 64.3                        | 0.00  | 16 |
| 17 | YYVGYLQPRTF | NTD    | 265-275   | 11     | 73.3                        | 0.26  | 17 |
| 18 | LYNSASFSTFK | RBD    | 368-378   | 11     | 76.3                        | 0.73  | 18 |
| 19 | VYSTGSNVFQ  | S1     | 635-644   | 10     | 93.3                        | 0.21  | 19 |
| 20 | EQYIKWPWYIW | TM     | 1207-1217 | 11     | 96.2                        | 0.38  | 20 |
| 21 | KYEQYIKWPW  | TM     | 1205-1214 | 10     | 110.2                       | 0.53  | 21 |
| 22 | FAMQMAYRF   | S2     | 898-906   | 9      | 111.5                       | 0.54  | 22 |
| 23 | QYIKWPWYIWL | TM     | 1208-1218 | 11     | 115.5                       | 0.40  | 23 |
| 24 | IYQTSNFRV   | S1     | 312-320   | 9      | 124.6                       | 0.00  | 24 |
| 25 | TYVPAQEKNF  | S2     | 1066-1075 | 10     | 137.3                       | 0.68  | 25 |
| 26 | GYLQPRTFLL  | NTD    | 268-277   | 10     | 138.1                       | 0.35  | 26 |
| 27 | RVYSSANNCTF | NTD    | 158-168   | 11     | 143.7                       | 0.17  | 27 |
| 28 | RFPNITNLCPF | RBD    | 328-338   | 11     | 149.3                       | 0.13  | 28 |
| 29 | KWPWYIWLG   | TM     | 1211-1219 | 9      | 152                         | 0.00  | 29 |

|    |             |     |         |    |       |      |    |
|----|-------------|-----|---------|----|-------|------|----|
| 30 | PYRVVLSF    | RBD | 507-515 | 9  | 152.4 | 0.00 | 30 |
| 31 | VYAWNKRRI   | RBD | 350-358 | 9  | 160.3 | 0.00 | 31 |
| 32 | VYSSANNCTFE | NTD | 159-169 | 11 | 172.5 | 0.31 | 32 |
| 33 | GNYNLYRLF   | RBD | 447-456 | 10 | 174.6 | 0.22 | 33 |
| 34 | YYHKNNKSW   | NTD | 144-152 | 9  | 223.5 | 0.32 | 34 |
| 35 | NYNLYRLFR   | RBD | 448-457 | 10 | 233.2 | 0.20 | 35 |
| 36 | IYSKHTPINL  | NTD | 203-212 | 10 | 233.7 | 0.00 | 36 |
|    |             |     | 1216-   |    |       |      |    |
| 37 | IWLGFAGLI   | TM  | 1225    | 10 | 239   | 0.00 | 37 |
| 38 | NCYFPLQSYGF | RBD | 487-497 | 11 | 243.2 | 0.16 | 38 |
| 39 | IYKTPPIKDF  | S2  | 788-797 | 10 | 252.1 | 0.24 | 39 |
| 40 | YNSASFSTF   | RBD | 369-377 | 9  | 252.4 | 0.61 | 40 |
| 41 | WRVYSTGSNVF | S1  | 633-643 | 11 | 274.1 | 0.00 | 41 |
| 42 | CYFPLQSYGFQ | RBD | 488-498 | 11 | 299.8 | 0.53 | 42 |
| 43 | TFEYVSQPF   | NTD | 167-175 | 9  | 337.1 | 0.58 | 43 |
| 44 | YFPLQSYGFQ  | RBD | 489-498 | 10 | 349.3 | 0.78 | 44 |
| 45 | RVYSTGSNVFQ | S1  | 634-644 | 11 | 371.1 | 0.32 | 45 |
| 46 | CFTNVYADSF  | RBD | 391-400 | 10 | 371.3 | 0.43 | 46 |
| 47 | EYVSQPFLM   | NTD | 169-177 | 9  | 373.2 | 0.53 | 47 |
|    |             |     | 1094-   |    |       |      |    |
| 48 | VFVSNGTHWF  | CD  | 1103    | 10 | 377.5 | 0.45 | 48 |
| 49 | YLQPRTFLL   | NTD | 269-277 | 9  | 406.7 | 0.25 | 49 |
| 50 | IPFAMQMAYRF | S2  | 896-906 | 11 | 427.8 | 0.30 | 50 |
| 51 | VYYHKNNKSW  | NTD | 143-152 | 10 | 488.9 | 0.00 | 51 |

**Supplementary Table 5. B\*07:02 spike peptides used for SCT production**

| ID | peptide     | domain | span             | length | predicted      |       | ID |
|----|-------------|--------|------------------|--------|----------------|-------|----|
|    |             |        |                  |        | nM<br>affinity | yield |    |
| 01 | SPRRARSVA   | S1/S2  | 680-688          | 9      | 4.2            | 0.25  | 01 |
| 02 | SPRRARSVAS  | S1/S2  | 680-689          | 10     | 18.4           | 0.27  | 02 |
| 03 | NSPRRARSVA  | S1/S2  | 679-688          | 10     | 20.1           | 0.09  | 03 |
| 04 | MIAQYTSAL   | S2     | 869-877          | 9      | 28.9           | 0.36  | 04 |
| 05 | YDPKVFRSSV  | NTD    | 38-47            | 10     | 50.2           | 0.60  | 05 |
| 06 | IPTNFTISV   | S2     | 714-722<br>1052- | 9      | 95.1           | 0.47  | 06 |
| 07 | FPQSAPHGVV  | S2     | 1061             | 10     | 99.6           | 0.44  | 07 |
| 08 | LPVSMTKTSV  | S2     | 727-736          | 10     | 100            | 0.22  | 08 |
| 09 | TNSPRRARSVA | S1/S2  | 678-688          | 11     | 104.1          | 0.12  | 09 |
| 10 | SPRRARSVASQ | S1/S2  | 680-690          | 11     | 136.2          | 0.23  | 10 |
| 11 | RARSVASQSI  | S1/S2  | 683-692          | 10     | 147            | 0.21  | 11 |
| 12 | QPYRVVLSF   | RBD    | 506-515          | 10     | 163.1          | 0.00  | 12 |
| 13 | LPPAYTNSF   | NTD    | 24-32            | 9      | 168            | 0.32  | 13 |
| 14 | FPNITNLCPF  | RBD    | 329-338<br>1212- | 10     | 175.2          | 0.00  | 14 |
| 15 | WPWYIWLGF   | TM     | 1220             | 9      | 193.4          | 0.00  | 15 |
| 16 | TPINLVRDL   | NTD    | 208-216          | 9      | 202.5          | 0.59  | 16 |
| 17 | VPVAIHADQL  | S1     | 620-629          | 10     | 210.8          | 0.19  | 17 |
| 18 | TPCSFGGVS   | S1     | 588-597          | 10     | 249.9          | 0.35  | 18 |
| 19 | YDPKVFRSSVL | NTD    | 38-48            | 11     | 255.4          | 0.59  | 19 |
| 20 | KPFERDISTEI | RBD    | 462-472<br>1014- | 11     | 286            | 0.50  | 20 |
| 21 | RAAEIRASA   | CH     | 1022             | 9      | 317.7          | 0.08  | 21 |
| 22 | SIIAYTMSL   | S2     | 691-699          | 9      | 328            | 0.29  | 22 |
| 23 | LPQGFSALEPL | NTD    | 216-226          | 11     | 337.2          | 0.68  | 23 |
| 24 | MIAQYTSALL  | S2     | 869-878          | 10     | 350.9          | 0.41  | 24 |
| 25 | NSPRRARSVAS | S1/S2  | 679-689          | 11     | 361.2          | 0.08  | 25 |
| 26 | AIPTNFTISV  | S2     | 713-722<br>1261- | 10     | 381            | 0.88  | 26 |
| 27 | SEPVLKGVKL  | CP     | 1270             | 10     | 388.2          | 0.08  | 27 |
| 28 | APGQTGKIA   | RBD    | 411-419<br>1052- | 9      | 407.8          | 0.38  | 28 |
| 29 | FPQSAPHGV   | S2     | 1060<br>1052-    | 9      | 409.9          | 0.45  | 29 |
| 30 | FPQSAPHGVVF | S2     | 1062             | 11     | 413.7          | 0.62  | 30 |
| 31 | ITRFQTLAL   | NTD    | 235-244          | 10     | 444.5          | 0.10  | 31 |
| 32 | VVNQNAQAL   | HR1    | 951-959          | 9      | 472.6          | 0.05  | 32 |
| 33 | SLSSTASAL   | HR1    | 937-945          | 9      | 492.4          | 0.00  | 33 |

**Supplementary Table 6. A\*02:01 PLpro peptides used for SCT production**

| ID | peptide     | span      | length | predicted   |       | ID |
|----|-------------|-----------|--------|-------------|-------|----|
|    |             |           |        | nM affinity | yield |    |
| 01 | ILFTRFFYV   | 1514-1522 | 9      | 3.2         | 0.23  | 01 |
| 02 | YILFTRFFYV  | 1513-1522 | 10     | 3.8         | 0.21  | 02 |
| 03 | YIFFASFYYV  | 1566-1575 | 10     | 5           | 0.13  | 03 |
| 04 | YLATALLTL   | 857-865   | 9      | 5.1         | 0.17  | 04 |
| 05 | WLMWLIINL   | 1545-1553 | 9      | 6.6         | 0.00  | 05 |
| 06 | YMPYFFTLL   | 1350-1358 | 9      | 7.1         | 0.21  | 06 |
| 07 | FLTENLLLYI  | 430-439   | 10     | 7.2         | 0.92  | 07 |
| 08 | KLINIIWFL   | 1407-1416 | 10     | 7.3         | 0.00  | 08 |
| 09 | QLFFSYFAV   | 1530-1538 | 9      | 10          | 0.09  | 09 |
| 10 | LLSAGIFGA   | 330-338   | 9      | 10.1        | 0.48  | 10 |
| 11 | AYILFTRFFYV | 1512-1522 | 11     | 10.5        | 0.17  | 11 |
| 12 | MQLFFSYFAV  | 1529-1538 | 10     | 10.7        | 0.32  | 12 |
| 13 | WLMWLIINLV  | 1545-1554 | 10     | 11          | 0.11  | 13 |
| 14 | YKLTDNVYI   | 213-222   | 10     | 12.5        | 0.24  | 14 |
| 15 | LMWLIINLV   | 1546-1554 | 9      | 13.3        | 0.00  | 15 |
| 16 | YMPYFFTLLL  | 1350-1359 | 10     | 13.9        | 0.10  | 16 |
| 17 | FLGRYMSAL   | 824-832   | 9      | 14.9        | 0.32  | 17 |
| 18 | KLMPVCVET   | 569-577   | 9      | 15.1        | 0.90  | 18 |
| 19 | FVMMSAPPA   | 986-994   | 9      | 15.1        | 1.32  | 19 |
| 20 | YVWKSYPVHV  | 1574-1582 | 9      | 15.2        | 0.85  | 20 |
| 21 | ILFTRFFYVL  | 1514-1523 | 10     | 16          | 0.10  | 21 |
| 22 | QLEMELTPVV  | 193-202   | 10     | 17          | 0.22  | 22 |
| 23 | YLNSTNVTI   | 1452-1460 | 9      | 17.2        | 0.10  | 23 |
| 24 | IIWFLLSV    | 1412-1420 | 9      | 19          | 0.00  | 24 |
| 25 | QLMCQPILL   | 1745-1753 | 9      | 19          | 0.41  | 25 |
| 26 | YLVQQESPFV  | 978-987   | 10     | 19.3        | 1.31  | 26 |
| 27 | QMAPISAMV   | 1555-1563 | 9      | 19.6        | 0.00  | 27 |
| 28 | CYLATALLTL  | 856-865   | 10     | 19.8        | 0.08  | 28 |
| 29 | KLLHKPIVWHV | 1166-1176 | 11     | 20.5        | 0.79  | 29 |
| 30 | YLFDESGEFL  | 88-98     | 11     | 22.2        | 0.74  | 30 |
| 31 | YILFTRFFYVL | 1513-1523 | 11     | 22.3        | 0.11  | 31 |
| 32 | MYIFFASFYYV | 1565-1575 | 11     | 22.7        | 0.09  | 32 |
| 33 | MQLFFSYFA   | 1529-1537 | 9      | 23.1        | 0.47  | 33 |
| 34 | ILGTVSWNL   | 549-557   | 9      | 23.6        | 0.00  | 34 |
| 35 | SWLMWLIINL  | 1544-1553 | 10     | 24.9        | 0.00  | 35 |
| 36 | LLHKPIVWHV  | 1167-1176 | 10     | 27          | 0.26  | 36 |
| 37 | ILLDQALV    | 1751-1759 | 9      | 27.1        | 0.87  | 37 |
| 38 | FISNSWLMWL  | 1540-1549 | 10     | 29          | 0.00  | 38 |



|    |             |           |    |      |      |    |
|----|-------------|-----------|----|------|------|----|
| 39 | KMFDAYVNT   | 1771-1779 | 9  | 30.2 | 0.88 | 39 |
| 40 | SLIYSTAAL   | 1424-1432 | 9  | 30.8 | 0.93 | 40 |
| 41 | YVWKSYPVHV  | 1574-1583 | 10 | 32.5 | 0.55 | 41 |
| 42 | FELDERIDKV  | 25-34     | 10 | 34.8 | 0.09 | 42 |
| 43 | KFLTENLLLYI | 429-439   | 11 | 36.4 | 0.22 | 43 |
| 44 | SKLINIIWFL  | 1406-1416 | 11 | 38.4 | 0.09 | 44 |
| 45 | VLLAPLLSA   | 325-333   | 9  | 40.8 | 0.93 | 45 |
| 46 | SQLMCQPILL  | 1744-1753 | 10 | 42.1 | 0.34 | 46 |
| 47 | FLKKDAPYI   | 460-468   | 9  | 42.2 | 0.18 | 47 |
| 48 | TLVTMPLGYV  | 626-635   | 10 | 43.5 | 0.75 | 48 |
| 49 | NTFSSTFNV   | 1778-1786 | 9  | 43.6 | 0.28 | 49 |
| 50 | YSQLMCQPILL | 1743-1753 | 11 | 45.4 | 0.12 | 50 |
| 51 | TLATHGLAAV  | 1303-1312 | 10 | 47.6 | 0.34 | 51 |
| 52 | NYMPYFFTLL  | 1349-1358 | 10 | 48.7 | 0.12 | 52 |
| 53 | AMVRMYIFFA  | 1561-1570 | 10 | 49   | 0.10 | 53 |
| 54 | IMQLFFSYFA  | 1528-1537 | 10 | 51.3 | 0.10 | 54 |
| 55 | KLVSSFLEM   | 367-375   | 9  | 52.5 | 0.40 | 55 |
| 56 | SLDNVLSTFI  | 1807-1816 | 10 | 52.8 | 0.29 | 56 |
| 57 | YTVELGTEV   | 42-50     | 9  | 53.7 | 0.64 | 57 |
| 58 | MLAKALRKV   | 494-502   | 9  | 54.2 | 0.50 | 58 |
| 59 | VLSTFISAA   | 1811-1819 | 9  | 55.3 | 0.13 | 59 |
| 60 | YLATALLTLQ  | 857-866   | 10 | 56.4 | 0.18 | 60 |
| 61 | FITESKPSV   | 396-404   | 9  | 57.5 | 0.48 | 61 |
| 62 | LVAEWFLAYI  | 1505-1514 | 10 | 59.3 | 0.13 | 62 |
| 63 | IIWFLLLSV   | 1411-1420 | 10 | 59.9 | 0.00 | 63 |
| 64 | SWLMWLIINLV | 1544-1554 | 11 | 61.5 | 0.08 | 64 |
| 65 | VQMAPISAMV  | 1554-1563 | 10 | 61.8 | 0.32 | 65 |
| 66 | IMQLFFSYFAV | 1528-1538 | 11 | 67.1 | 0.07 | 66 |
| 67 | QLMCQPILL   | 1745-1754 | 10 | 67.6 | 0.43 | 67 |
| 68 | FGLVAEWFLA  | 1503-1512 | 10 | 67.7 | 0.49 | 68 |
| 69 | YLDGADVTKI  | 780-789   | 10 | 67.8 | 0.21 | 69 |
| 70 | NLAKHCLHV   | 291-299   | 9  | 68   | 0.14 | 70 |
| 71 | YIFFASFYVW  | 1566-1576 | 11 | 68.1 | 0.09 | 71 |
| 72 | ILAYCNKTV   | 896-904   | 9  | 68.7 | 0.17 | 72 |
| 73 | LLSVCLGSL   | 1416-1425 | 10 | 71.4 | 0.36 | 73 |
| 74 | LLDQALVSDV  | 1753-1762 | 10 | 80.1 | 0.27 | 74 |
| 75 | FLKKDAPYIV  | 460-469   | 10 | 80.8 | 0.21 | 75 |
| 76 | LLAPLLSAGI  | 326-335   | 10 | 80.9 | 0.58 | 76 |
| 77 | KLINIIWFL   | 1407-1417 | 11 | 81   | 0.17 | 77 |
| 78 | SLKVPATVSV  | 650-659   | 10 | 85.2 | 0.11 | 78 |
| 79 | KLDGVVCTEI  | 1065-1074 | 10 | 87.1 | 0.18 | 79 |
| 80 | IFFASFYV    | 1567-1575 | 9  | 87.8 | 0.07 | 80 |
| 81 | YLAVFDKNL   | 356-364   | 9  | 89   | 0.42 | 81 |

|     |             |           |    |       |      |     |
|-----|-------------|-----------|----|-------|------|-----|
| 82  | YMRSKVPATV  | 647-657   | 11 | 89.2  | 0.13 | 82  |
| 83  | AVIKTLQPV   | 60-68     | 9  | 89.6  | 0.61 | 83  |
| 84  | ALLTLQQIEL  | 861-870   | 10 | 91.7  | 1.06 | 84  |
| 85  | FCLEASFNYL  | 1391-1400 | 10 | 93.3  | 0.49 | 85  |
| 86  | TLNDLNETL   | 619-627   | 9  | 95.6  | 0.14 | 86  |
| 87  | ALQDAYYRA   | 876-884   | 9  | 100.3 | 0.08 | 87  |
| 88  | NYMPYFFTLLL | 1349-1359 | 11 | 101.3 | 0.10 | 88  |
| 89  | FLTENLLLYID | 430-440   | 11 | 102   | 1.00 | 89  |
| 90  | GLVAEWFLA   | 1504-1512 | 9  | 105.3 | 0.24 | 90  |
| 91  | YVNTFSSTFNV | 1776-1786 | 11 | 110.1 | 0.46 | 91  |
| 92  | VLGLAAIMQL  | 1522-1531 | 10 | 111.3 | 0.09 | 92  |
| 93  | PLLSAGIFGA  | 329-338   | 10 | 111.6 | 0.13 | 93  |
| 94  | YVDNSSLTI   | 1281-1289 | 9  | 115.3 | 0.41 | 94  |
| 95  | RKLMPVCVET  | 568-577   | 10 | 121.6 | 0.08 | 95  |
| 96  | WLDDDSQQTV  | 161-170   | 10 | 124.2 | 0.30 | 96  |
| 97  | ILFTRFFVVLG | 1514-1525 | 11 | 125.3 | 0.14 | 97  |
| 98  | LINIIWFL    | 1408-1417 | 9  | 126.6 | 0.08 | 98  |
| 99  | NLACEDLKPV  | 1220-1230 | 10 | 128.4 | 0.22 | 99  |
| 100 | KLSHQSDIEV  | 1838-1848 | 10 | 128.5 | 0.40 | 100 |
| 101 | LMWLIINLVQ  | 1546-1556 | 10 | 131.1 | 0.13 | 101 |
| 102 | YYVWKSYPVHV | 1573-1583 | 10 | 131.2 | 0.15 | 102 |
| 103 | SLINTLNDL   | 615-624   | 9  | 133   | 1.49 | 103 |
| 104 | GYLKLTDNVYI | 212-223   | 11 | 135.4 | 0.10 | 104 |
| 105 | NLAKHCLHVV  | 291-301   | 10 | 137.4 | 0.19 | 105 |
| 106 | TLNDLNETLV  | 619-629   | 10 | 139.8 | 0.22 | 106 |
| 107 | FTRFFVVLGL  | 1516-1526 | 10 | 142.2 | 0.28 | 107 |
| 108 | NSWLMWLIINL | 1543-1554 | 11 | 149.1 | 0.00 | 108 |
| 109 | WLMWLIINLVQ | 1545-1556 | 11 | 154.2 | 0.09 | 109 |
| 110 | QLFFSYFAVH  | 1530-1540 | 10 | 156.8 | 0.00 | 110 |
| 111 | FLNKVVSTT   | 1327-1336 | 9  | 157   | 0.32 | 111 |
| 112 | GYLNSTNVTI  | 1451-1461 | 10 | 164.2 | 0.09 | 112 |
| 113 | VLTAVVIPT   | 477-486   | 9  | 168.2 | 0.16 | 113 |
| 114 | LLLQLCTFT   | 1357-1366 | 9  | 169.2 | 0.32 | 114 |
| 115 | PQLEMELTPVV | 192-203   | 11 | 170.5 | 0.21 | 115 |
| 116 | VLPNDDTLRV  | 802-812   | 10 | 172.5 | 0.08 | 116 |
| 117 | NCYLATALLTL | 855-866   | 11 | 173.3 | 0.13 | 117 |
| 118 | SAFYILPSI   | 533-542   | 9  | 179.7 | 0.13 | 118 |
| 119 | TLYCIDGALL  | 1026-1036 | 10 | 180.9 | 0.10 | 119 |
| 120 | LMCQPILL    | 1746-1755 | 9  | 184.2 | 0.35 | 120 |
| 121 | IIFWLLSVC   | 1412-1422 | 10 | 188   | 0.00 | 121 |
| 122 | FSYFAVHFI   | 1533-1542 | 9  | 195.1 | 0.13 | 122 |

|     |             |           |    |       |      |     |
|-----|-------------|-----------|----|-------|------|-----|
| 123 | SFLGRYMSAL  | 823-833   | 10 | 196.9 | 0.07 | 123 |
| 124 | MPLGYVTHGL  | 630-640   | 10 | 197.4 | 0.10 | 124 |
| 125 | LILAYCNKTV  | 895-905   | 10 | 199.2 | 0.15 | 125 |
| 126 | MQLFFSYFAVH | 1529-1540 | 11 | 214.2 | 0.12 | 126 |
| 127 | QLEMELTPV   | 193-202   | 9  | 215.1 | 0.23 | 127 |
| 128 | EILGTVSWNL  | 548-558   | 10 | 217.3 | 0.13 | 128 |
| 129 | PILLDQALV   | 1750-1760 | 10 | 222.8 | 0.17 | 129 |
| 130 | FLAYILFTRF  | 1510-1520 | 10 | 226.9 | 0.00 | 130 |
| 131 | KYLVQQESPV  | 977-988   | 11 | 230.2 | 0.09 | 131 |
| 132 | LLTLQQIEL   | 862-871   | 9  | 239.6 | 0.77 | 132 |
| 133 | FISNSWLMWLI | 1540-1551 | 11 | 240.2 | 0.00 | 133 |
| 134 | TTIQTIVEV   | 182-191   | 9  | 241.3 | 0.69 | 134 |
| 135 | KIAEIPKEEV  | 384-394   | 10 | 247.7 | 0.19 | 135 |
| 136 | YLKSPNFSKL  | 1399-1409 | 10 | 248.8 | 0.07 | 136 |
| 137 | KLMPVCVETKA | 569-580   | 11 | 249.5 | 0.82 | 137 |
| 138 | YIATNGPLKV  | 272-282   | 10 | 250.5 | 0.09 | 138 |
| 139 | YMRSCLKVPA  | 647-656   | 9  | 251.4 | 0.10 | 139 |
| 140 | MELTPVVQTI  | 196-206   | 10 | 255.7 | 0.11 | 140 |
| 141 | TLYCIDGAL   | 1026-1035 | 9  | 267.7 | 0.08 | 141 |
| 142 | IDLDEWSMAT  | 77-87     | 10 | 281.2 | 0.09 | 142 |
| 143 | YLNSTNVTIA  | 1452-1462 | 10 | 289.4 | 0.09 | 143 |
| 144 | MQVESDDYI   | 265-274   | 9  | 294   | 0.24 | 144 |
| 145 | EVLAPLLSA   | 324-334   | 10 | 296.2 | 0.07 | 145 |
| 146 | SLETIQITI   | 1485-1494 | 9  | 297.5 | 0.25 | 146 |
| 147 | GLVAEWFLAYI | 1504-1515 | 11 | 300.4 | 0.20 | 147 |
| 148 | FLLSVCLGS   | 1415-1425 | 10 | 300.8 | 0.00 | 148 |
| 149 | YYVWKSYPVHV | 1573-1584 | 11 | 302.2 | 0.00 | 149 |
| 150 | LLSVCLGSL   | 1417-1426 | 9  | 305.3 | 0.11 | 150 |
| 151 | VNTFSSTFNV  | 1777-1787 | 10 | 308.6 | 0.09 | 151 |
| 152 | YMPYFFTLQQ  | 1350-1361 | 11 | 309   | 0.09 | 152 |
| 153 | TLQPVSELL   | 64-73     | 9  | 315   | 0.32 | 153 |
| 154 | FLLSVCLGSL  | 1415-1426 | 11 | 324.7 | 0.06 | 154 |
| 155 | NLYDKLVSSFL | 363-374   | 11 | 325.4 | 0.28 | 155 |
| 156 | LLYIDINGNL  | 436-446   | 10 | 327.3 | 0.28 | 156 |
| 157 | FGDDTVIEV   | 7-16      | 9  | 328.5 | 0.30 | 157 |
| 158 | RTIKVFTTV   | 748-757   | 9  | 330.4 | 0.75 | 158 |
| 159 | LIYSTAALGV  | 1425-1435 | 10 | 330.8 | 0.14 | 159 |
| 160 | FLEMKSEKQV  | 372-382   | 10 | 334.8 | 0.09 | 160 |
| 161 | LLSAGIFGAD  | 330-340   | 10 | 351.2 | 0.32 | 161 |
| 162 | GSLIYSTAAL  | 1423-1433 | 10 | 358.6 | 0.94 | 162 |
| 163 | YLFDESCEF   | 88-97     | 9  | 360   | 0.68 | 163 |

|     |             |           |    |       |      |     |
|-----|-------------|-----------|----|-------|------|-----|
| 164 | PFVMMMSAPPA | 985-995   | 10 | 363.4 | 0.20 | 164 |
| 165 | TFELDERIDKV | 24-35     | 11 | 368.3 | 0.08 | 165 |
| 166 | CLGSLIYST   | 1421-1430 | 9  | 375.2 | 0.07 | 166 |
| 167 | KLINIIWF    | 1407-1416 | 9  | 382.9 | 0.10 | 167 |
| 168 | WLIINLVQMA  | 1548-1558 | 10 | 395.1 | 0.00 | 168 |
| 169 | LVQMAPISAMV | 1553-1564 | 11 | 402.1 | 0.49 | 169 |
| 170 | MVRMYIFFA   | 1562-1571 | 9  | 404   | 0.00 | 170 |
| 171 | KLMPVCVETK  | 569-579   | 10 | 404.3 | 0.94 | 171 |
| 172 | NLHPDSATL   | 444-453   | 9  | 411.9 | 0.12 | 172 |
| 173 | HFISNSWLMWL | 1539-1550 | 11 | 415.1 | 0.00 | 173 |
| 174 | VLMSNLGMPS  | 1434-1444 | 10 | 417.1 | 0.45 | 174 |
| 175 | LVQQESPFV   | 979-988   | 9  | 419.2 | 0.19 | 175 |
| 176 | KLTCATTRQV  | 1923-1933 | 10 | 430.8 | 0.08 | 176 |
| 177 | FVCDNIKFA   | 1112-1121 | 9  | 432.8 | 0.63 | 177 |
| 178 | DKLVSSFLEM  | 366-376   | 10 | 447   | 0.00 | 178 |
| 179 | TIVEVQPQL   | 186-195   | 9  | 447.8 | 0.58 | 179 |
| 180 | KSVNITFEL   | 19-28     | 9  | 453.2 | 0.82 | 180 |
| 181 | VLNEKCSAYTV | 34-45     | 11 | 457.4 | 0.10 | 181 |
| 182 | FLAYILFTR   | 1510-1519 | 9  | 460.6 | 0.05 | 182 |
| 183 | TNYMPYFFLL  | 1348-1359 | 11 | 467.8 | 0.00 | 183 |
| 184 | NIIWFLLLSV  | 1410-1421 | 11 | 470.4 | 0.00 | 184 |
| 185 | TMSYLFQHA   | 913-922   | 9  | 481.5 | 0.00 | 185 |
| 186 | FPDLNGDVVAI | 1142-1153 | 11 | 489.5 | 0.10 | 186 |
| 187 | LLLDQALVSDV | 1752-1763 | 11 | 491.8 | 1.24 | 187 |
| 188 | YPQVNGLSI   | 840-850   | 10 | 491.9 | 0.00 | 188 |
| 189 | KLASHMYCS   | 97-106    | 9  | 493.4 | 0.38 | 189 |
| 190 | HNLAKHCLHV  | 290-300   | 10 | 494.6 | 0.00 | 190 |
| 191 | YLVQQESPFVM | 978-989   | 11 | 497.2 | 1.48 | 191 |

**Supplementary Table 7. List of TCRs, cognate antigens, and their groupings**

| TCR ID | EC50   | IncuCyte | Peptide  | Peptide     | TCR group | HLA     | Protein  | TRAV     | CDR3a            | TRAJ    | TRBV     | CDR3b             | TRBJ    | TRBC  | Patient                 |
|--------|--------|----------|----------|-------------|-----------|---------|----------|----------|------------------|---------|----------|-------------------|---------|-------|-------------------------|
| 002    | 70.5   | 0.987808 | A2-S-46  | RLITGRLOSL  | F/F       | A*02:01 | S        | TRAV39   | CAVDANNDMRF      | TRAJ43  | TRBV12-4 | CASSPSYNEQFF      | TRBJ2-1 | TRBC2 | GB18622 (healthy donor) |
| 118    | 90.0   | 0.971802 | A2-CMV   | NLVPVMVATV  | F/F       | A*02:01 | S        | TRAV24   | CACPPGDYKLSF     | TRAJ20  | TRBV7-8  | CASLDIPSYNEQFF    | TRBJ2-1 | TRBC2 | InCoV005-CV             |
| 084    | 107.0  | 0.988771 | A2-S-46  | RLITGRLOSL  | F/F       | A*02:01 | S        | TRAV22   | CAAQSNMEYGNKLVF  | TRAJ47  | TRBV5-4  | CASSPDRGGTNEKLF   | TRBJ1-4 | TRBC1 | GB17457 (healthy donor) |
| 079    | 113.0  | 0.938558 | A2-S-46  | RLITGRLOSL  | F/F       | A*02:01 | S        | TRAV19   | CALSEGYNFNKVF    | TRAJ21  | TRBV20-1 | CSGEGGDTTEAFF     | TRBJ1-1 | TRBC1 | InCoV005-CV             |
| 152    | 117.1  | 0.982336 | A2-S-46  | RLITGRLOSL  | F/F       | A*02:01 | S        | TRAV17   | CATDLKTSYDKVIF   | TRAJ50  | TRBV20-1 | CSARDPGLQNIQYF    | TRBJ2-4 | TRBC2 | InCoV005-CV             |
| A2-CMV | 128.1  | 0.921789 | A2-CMV   | NLVPVMVATV  | F/F       | A*02:01 | CMV      |          |                  |         |          |                   |         |       | InCoV194-T2             |
| 083    | 129.3  | 0.980294 | A2-S-46  | RLITGRLOSL  | F/F       | A*02:01 | S        | TRAV20   | CAVQAAREYFNKVF   | TRAJ21  | TRBV3-1  | CASSQEGDRVTEAFF   | TRBJ1-1 | TRBC1 | GB18622 (healthy donor) |
| 039    | 129.6  | 0.981115 | A2-S-46  | RLITGRLOSL  | F/F       | A*02:01 | S        | TRAV17   | CATDLKTSYDKVIF   | TRAJ50  | TRBV20-1 | CSARSPGELNIQYF    | TRBJ2-4 | TRBC2 | InCoV002-CV             |
| 156    | 143.2  | 0.915092 | A2-S-29  | KQIYKTPPI   | F/F       | A*02:01 | S        | TRAV4    | CLVPSQAGTALIF    | TRAJ15  | TRBV20-1 | CSASSTHSNQPQHF    | TRBJ1-5 | TRBC1 | InCoV002-CV             |
| 001    | 148.6  | 0.925161 | A2-S-13  | LLFNKVTLA   | F/F       | A*02:01 | S        | TRAV9-2  | CALNDYKLSF       | TRAJ20  | TRBV28   | CASLITGGGQYQF     | TRBJ2-7 | TRBC2 | GB18622 (healthy donor) |
| 151    | 153.6  | 0.968874 | A2-S-46  | RLITGRLOSL  | F/F       | A*02:01 | S        | TRAV25   | CAGHPKTSYDKVIF   | TRAJ50  | TRBV20-1 | CSARDPGLQNIQYF    | TRBJ2-4 | TRBC2 | InCoV005-CV             |
| 034    | 164.1  | 0.976687 | A2-S-46  | RLITGRLOSL  | F/F       | A*02:01 | S        | TRAV10   | CVVSPINQGNFV     | TRAJ26  | TRBV3-1  | CASSQEQEPHOETQYF  | TRBJ2-5 | TRBC2 | InCoV002-CV             |
| 109    | 216.0  | 0.924808 | A2-P-51  | TLATHGLAAV  | M/F       | A*02:01 | P        | TRAV8-4  | CAVLVPGNQYF      | TRAJ49  | TRBV19   | CASSIAGNNEQFF     | TRBJ2-1 | TRBC2 | InCoV002-CV             |
| 144    | 226.0  | 0.911642 | B7-S-30  | FPQSAPHGVVF | M/F       | B*07:02 | S        | TRAV17   | CATEDNAGNMLTF    | TRAJ39  | TRBV9    | CASSVGGGGSDTQYF   | TRBJ2-3 | TRBC2 | InCoV006-CV             |
| 111    | 238.5  | 0.752108 | A2-P-33  | MQLFFSYFA   | M/F       | A*02:01 | P        | AV38-2/D | CAYGDDKIIF       | TRAJ30  | TRBV19   | CASSIALSTFQPHF    | TRBJ1-5 | TRBC1 | InCoV002-CV             |
| 121    | 245.4  | 0.797145 | B7-S-05  | YDPKVRSSV   | M/F       | B*07:02 | S        | TRAV27   | CAGGYNNDMRF      | TRAJ43  | TRBV6-6  | CASSLGEQPHF       | TRBJ1-5 | TRBC1 | InCoV006-CV             |
| 032    | 251.3  | 0.85282  | B7-S-05  | YDPKVRSSV   | M/F       | B*07:02 | S        | TRAV27   | CAGGYNNDMRF      | TRAJ43  | TRBV9    | CASSVGGGGSDTQYF   | TRBJ2-3 | TRBC2 | InCoV006-CV             |
| 102    | 260.8  | 0.800694 | A2-S-84  | ALQIPFAMQM  | M/F       | A*02:01 | S        | TRAV5    | CAETLNTGFQKLVF   | TRAJ8   | TRBV28   | CASRTLRLGHVSEAFF  | TRBJ1-1 | TRBC1 | InCoV005-CV             |
| 108    | 272.0  | 0.774104 | A2-S-65  | KIYSKHTPI   | M/F       | A*02:01 | S        | TRAV12-2 | CAVDVDFSGGTSYKLT | TRAJ52  | TRBV28   | CASSFPGYGYTF      | TRBJ1-2 | TRBC1 | InCoV002-CV             |
| A2-NY  | 309.9  | 0.848193 | A2-NY    | SLIMWITQC   | M/F       | A*02:01 | NY-ESO-1 | TRAV21-1 | CAVRPLYGGSYIPTF  | TRAJ6-1 | TRBV6-5  | CASSYVGNTEGELF    | TRBJ2-2 | TRBC2 | healthy donor           |
| 113    | 304.1  | 0.194018 | B7-S-13  | LPPAYTNSF   | NF        | B*07:02 | S        | TRAV8-4  | CAVFFNQAGTALIF   | TRAJ15  | TRBV12-4 | CASSKGLSNEQFF     | TRBJ2-1 | TRBC2 | InCoV006-CV             |
| 127    | 330.5  | 0.046486 | A24-S-22 | FAMQMAYRF   | NF        | A*24:02 | S        | TRAV24   | CARNSGGQYKVF     | TRAJ13  | TRBV5-6  | CASSLMMNEQYF      | TRBJ2-7 | TRBC2 | InCoV001-CV             |
| 148    | 361.3  | 0.088618 | B7-S-11  | RARSVASQSI  | NF        | B*07:02 | S        | TRAV8-2  | CVVRDGGYNKLVF    | TRAJ4   | TRBV10-3 | CATFTGNTEAFF      | TRBJ1-1 | TRBC1 | InCoV006-CV             |
| 116    | 373.7  | 0.092381 | A24-S-22 | FAMQMAYRF   | NF        | A*24:02 | S        | TRAV24   | CAFSGGTSYKLT     | TRAJ52  | TRBV5-6  | CASSLDGTGREKLF    | TRBJ1-4 | TRBC1 | InCoV009-CV             |
| 106    | 401.0  | 0.051551 | A24-S-22 | FAMQMAYRF   | NF        | A*24:02 | S        | TRAV24   | CAFSGGNSYKLT     | TRAJ53  | TRBV5-6  | CASSFGTPTSDTQYF   | TRBJ2-3 | TRBC2 | InCoV009-CV             |
| 036    | 471.3  | 0.116178 | A2-S-46  | RLITGRLOSL  | NF        | A*02:01 | S        | TRAV12-2 | CAGRPYDKIIF      | TRAJ30  | TRBV3-1  | CASSQEQEPHOETQYF  | TRBJ1-2 | TRBC2 | InCoV002-CV             |
| 140    | 522.7  | 0.096399 | B7-S-13  | LPPAYTNSF   | NF        | B*07:02 | S        | TRAV16   | CALTKIAAGNKLT    | TRAJ17  | TRBV5-5  | CASSLDGRLGYTF     | TRBJ1-2 | TRBC1 | InCoV006-CV             |
| 094    | 800.9  | 0.103591 | A2-P-58  | MLAKALRKV   | NF        | A*02:01 | P        | TRAV35   | CAGPIGTSYDKVIF   | TRAJ50  | TRBV12-4 | CASSSAHYGYTF      | TRBJ1-2 | TRBC1 | InCoV002-CV             |
| 155    | 922.4  | 0.083552 | A2-S-46  | RLITGRLOSL  | NF        | A*02:01 | S        | TRAV35   | CAGQLVASYDKVIF   | TRAJ50  | TRBV20-1 | CSARTGTSEYNEQFF   | TRBJ2-1 | TRBC2 | InCoV005-CV             |
| 087    | 1237.0 | 0.131551 | A2-P-58  | MLAKALRKV   | NF        | A*02:01 | P        | RAV29/DV | CAASDDNYGNQVNFV  | TRAJ26  | TRBV7-9  | CASSPDDRESSYNEQFF | TRBJ2-1 | TRBC2 | InCoV002-CV             |
| 092    | 2024.0 | 0.228311 | A2-P-58  | MLAKALRKV   | NF        | A*02:01 | P        | TRAV35   | CAGLNQGAQKLVF    | TRAJ54  | TRBV7-9  | CASSPDDRESSYNEQFF | TRBJ2-1 | TRBC2 | InCoV002-CV             |

\*F/F: fast and functional, M/F: medium and functional, N/F: non-functional
