# Supplementary material
Source: PubMed Central journal article supplement (PMC10188612)
Supplement: 42003_2023_4899_MOESM3_ESM.pdf [file 42003_2023_4899_MOESM3_ESM.pdf]

## Description of Additional Supplementary Files

**File name:** Supplementary Data

**Description:** Source data behind numerical plots in the paper.
